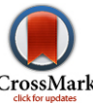

# Lamniform Shark Teeth from the Late Cretaceous of Southernmost South America (Santa Cruz Province, Argentina)

Elena R. Schroeter<sup>1</sup>, Victoria M. Egerton<sup>2</sup>, Lucio M. Ibiricu<sup>3</sup>, Kenneth J. Lacovara<sup>4\*</sup>

**1** Department of Biology, Drexel University, Philadelphia, Pennsylvania, United States of America, **2** School of Earth, Atmospheric and Environmental Sciences, University of Manchester, Manchester, United Kingdom, **3** Laboratorio de Paleontología, Centro Nacional Patagónico–Consejo Nacional de Investigaciones Científicas Y Técnicas, Puerto Madryn, Chubut, Argentina, **4** Department of Biodiversity, Earth and Environmental Science, Drexel University, Philadelphia, Pennsylvania, United States of America

## Abstract

Here we report multiple lamniform shark teeth recovered from fluvial sediments in the (Campanian–Maastrichtian) Cerro Fortaleza Formation, Santa Cruz Province, Argentina. This small tooth assemblage is compared to various lamniform sharks possessing similar dental morphologies, including *Archaeolamna*, *Cretalamna*, *Dwardius*, *Dallasiella*, and *Cretodus*. Although the teeth share numerous morphological features with the genus *Archaeolamna*, including a developed neck that maintains a relatively consistent width along the base of the crown, the small sample size and incomplete nature of these specimens precludes definitive taxonomic assignment. Regardless, the discovery of selachian teeth unique from those previously described for the region broadens the known diversity of Late Cretaceous South American sharks. Additionally, the discovery of the teeth in fluvial sandstone may indicate a euryhaline paleobiology in the lamniform taxon or taxa represented by this tooth assemblage.

**Citation:** Schroeter ER, Egerton VM, Ibiricu LM, Lacovara KJ (2014) Lamniform Shark Teeth from the Late Cretaceous of Southernmost South America (Santa Cruz Province, Argentina). PLoS ONE 9(8): e104800. doi:10.1371/journal.pone.0104800

**Editor:** Matt Friedman, University of Oxford, United Kingdom

**Received:** November 27, 2013; **Accepted:** July 17, 2014; **Published:** August 20, 2014

**Copyright:** © 2014 Schroeter et al. This is an open-access article distributed under the terms of the Creative Commons Attribution License, which permits unrestricted use, distribution, and reproduction in any medium, provided the original author and source are credited.

**Funding:** This work was funded by the Betz Fund for Environmental Science, Drexel University, and a National Science Foundation Graduate Research Fellowship award (DGE 1002809). The funders had no role in study design, data collection and analysis, decision to publish, or preparation of the manuscript.

**Competing Interests:** The authors have declared that no competing interests exist.

\* Email: lacovara@drexel.edu

## Introduction

The Cerro Fortaleza Formation (Campanian–Maastrichtian) is located in the Río La Leona Valley in Santa Cruz Province, Argentina. Stratigraphic terminology has been inconsistently applied across this region, and the Cerro Fortaleza Formation is sometimes referred to in previous publications as the Pari Aike, Chorrillo, or Mata Amarilla Formation [1–10]. Arbe and Hechem [4] distinguished the Upper Cretaceous fluvial outcrops in the Río Leona Valley as a distinct formation, which we assign to the Cerro Fortaleza Formation. The Cerro Fortaleza Formation is clearly terrestrial and consists predominantly of cross-bedded, friable sandstones interbedded with layers of mudstones and occasional lignitic horizons [1,2,4–7,11–13]. Based on the presence of paleosols and lignitic horizons, Macellari [12] inferred a humid climate with intervals of high rainfall and a high water table. Avulsion surfaces, histosols [14], carbonaceous root fossils, and silicified wood [15] suggest a low-lying, poorly drained forested terrain.

Recent work in the Cerro Fortaleza Formation has yielded numerous shark teeth, including two nearly complete specimens and multiple fragments. While we cannot entirely discount the possibility of reworking, only a few of the teeth (e.g., MPM-PV 3268) described in this study show evidence of wear (e.g., abrasion, rounding, pitting) or other indicators of significant transportation. This suggests that at least some of the teeth may have been originally deposited in the fluvial environment recorded by the

Cerro Fortaleza Formation [4,6,7,12–16], indicating they belonged to selachian species capable of tolerating a broad range of salinity. We compare this small tooth assemblage with teeth from various lamniform sharks possessing similar dental morphologies, including *Archaeolamna*, *Cretalamna*, *Dwardius*, *Dallasiella*, and *Cretodus*.

## Materials and Methods

### Locality and Age

Selachian teeth were recovered from a site on the southeastern flank of Cerro Fortaleza (49°57'10"S 72° 2'51"W) in Santa Cruz Province, Argentina (fig. 1), from within the Cerro Fortaleza Formation. The teeth were collected from a cross-bedded to planar, medium- to fine-grained sandstone deposited as a channel-fill fluvial facies, bounded by overbank facies with well-developed paleosols. There is a degree of uncertainty with respect to the chronostratigraphic assignment of the Cerro Fortaleza Formation [15]. Although some authors place it in the lower portion of the Upper Cretaceous [14], we agree with those authors assigning it to the Campanian–Maastrichtian stages of the Upper Cretaceous. This assignment is based on biostratigraphic correlation using ammonite and pollen biozones for the underlying Campanian La Anita Formation and the overlying Maastrichtian La Irene Formation, respectively (c.f., [15,16]).

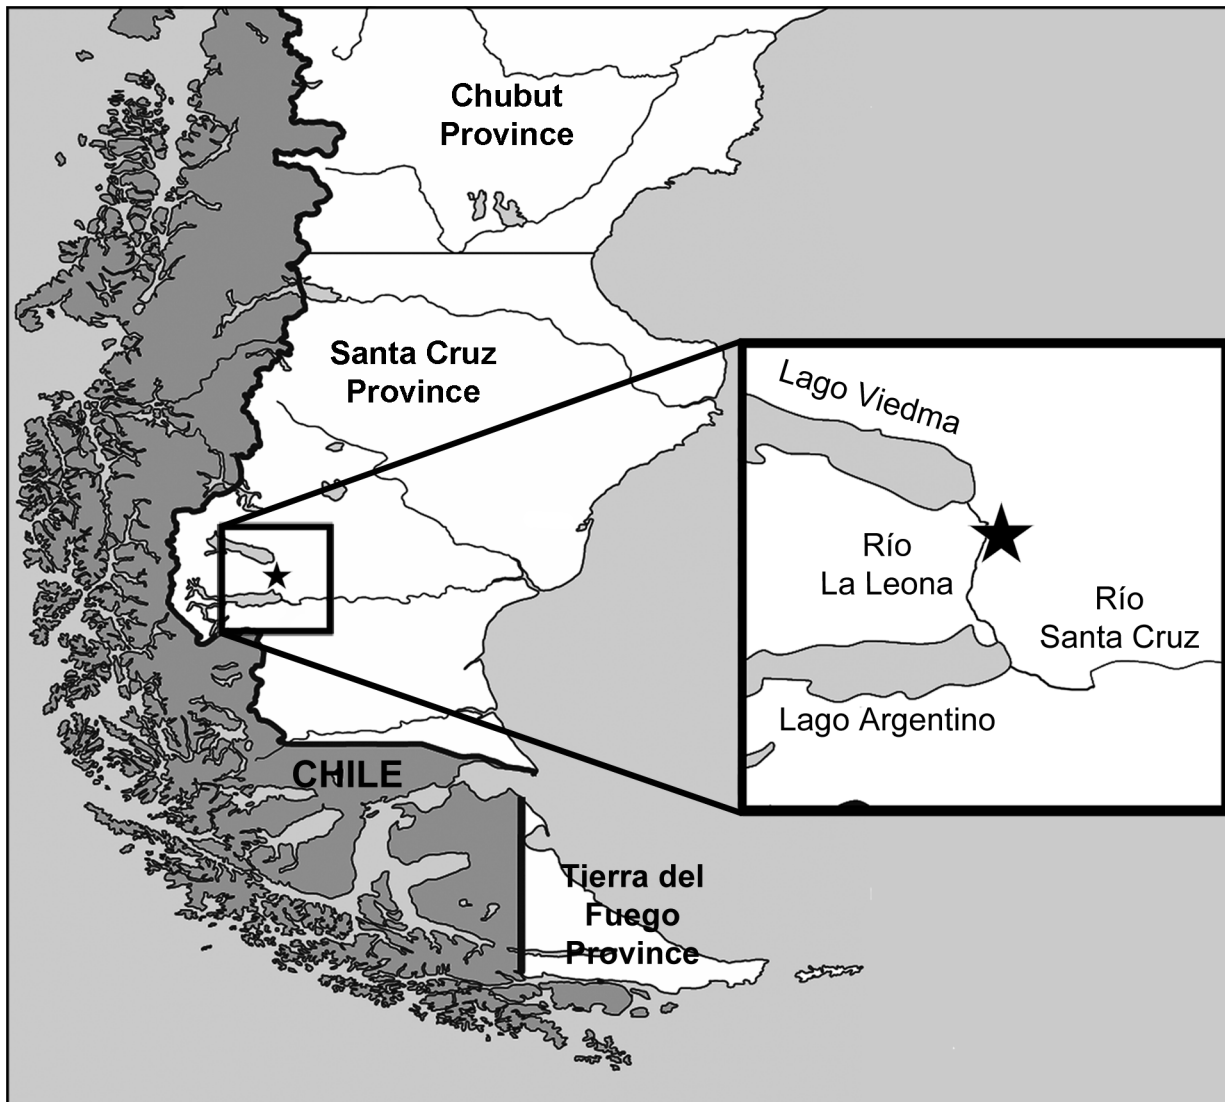

**Figure 1. Locality map of discovery site.** The star marked on the inset map denotes the location the selachian teeth were recovered from, approximately halfway between the eastern boundaries Lago Viedma and Lago Argentino (adapted from Mapa de la provincia de Santa Cruz, <http://es.wikipedia.org/wiki/Archivo>). doi:10.1371/journal.pone.0104800.g001

## Methods

Fieldwork and collection permits were issued by the government of Santa Cruz Province through Museo Padre Molina (Río Gallegos, Argentina), where the specimens are reposit. Teeth were obtained by surface collecting in sediment recently weathered from lithified exposures of fluvial sandstone and overbank shale facies of the Cerro Fortaleza Formation over an area of approximately 500 m<sup>2</sup>. The site is located on a bald mountaintop that allows for the accumulation of very little unconsolidated sediment, but also precludes the possibility of modern transportation in from other locations. The limited amount of weathered material available did not permit sampling of the site via screen washing.

For the description, we follow the tooth terminology of Shimada [17]. The dental measurements (e.g. tooth height, crown height, mesial cutting edge length, distal cutting edge length) follow Shimada [18], with the addition of distal inclination (DI), sensu Cook [19].

## Material

Two nearly complete specimens (MPM-PV 3267 and MPM-PV 3268) were recovered from the Cerro Fortaleza Formation, Santa Cruz Province, Argentina. MPM-PV 3267 is complete, except for the tip of one root lobe and the tip of the opposing lateral cusplet (fig. 2). Though the apical portion of this lateral cusplet is missing, the preserved base and breakage surface show that it was present and was singular. MPM-PV 3268 is missing the entire distal root lobe, including the (presumed) attached cusplet (fig. 3). Additional fragments (MPM-PV 3269–MPM-PV 3275, fig. 4–5) possessing morphology consistent with the two complete specimens plus additional informative characters were also recovered from the same horizon.

## Institutional Abbreviations

MPM: Museo Padre Molina, Río Gallegos, Santa Cruz.

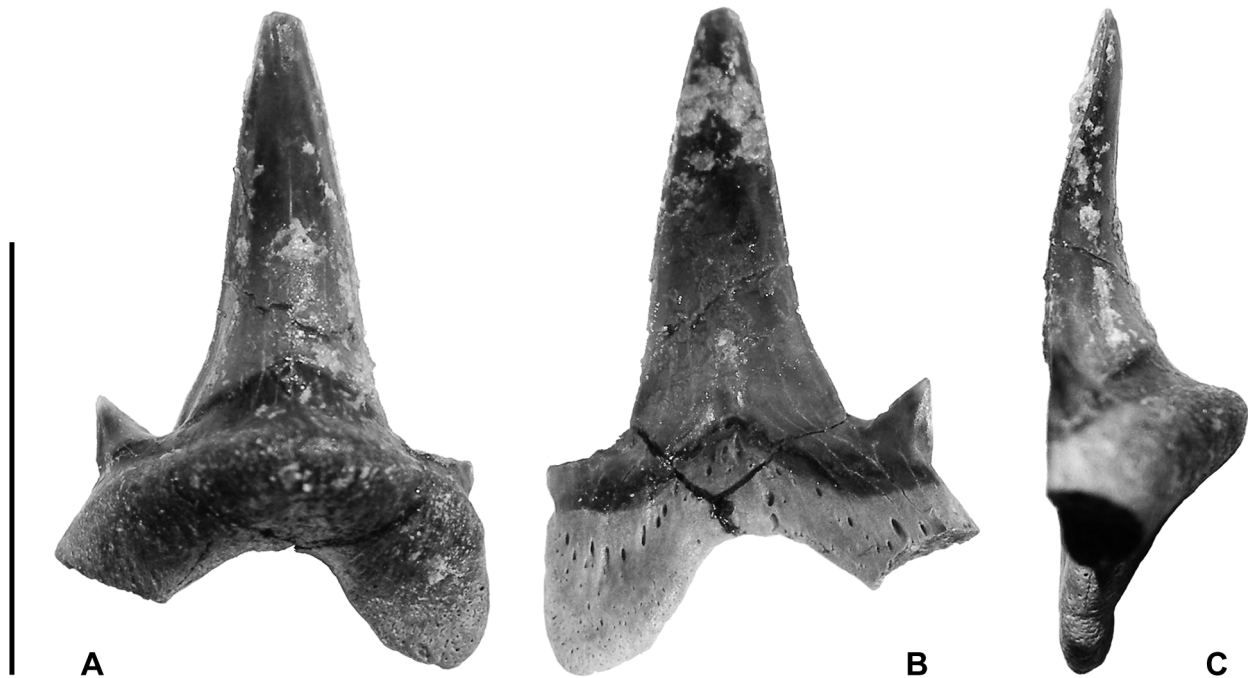

**Figure 2. MPM-PV 3267.** Lamniform tooth in (A) lingual, (B) labial, and (C) lateral view. Note the slenderness of the principle cusp, the well-pronounced lingual protuberance lacking a nutrient groove, and the developed neck that maintains a constant width across all cusps. Scale bar equals 1 cm.

doi:10.1371/journal.pone.0104800.g002

#### Associated Fauna

Surface collecting at this locality produced additional material, including fragments of dinosaur bones, dipnoan teeth, testudine shell fragments and semionotiform/lepisoteid scales. Though effort was made to collect all exposed microfossils, the selachian teeth described in this study were the only chondrichthyan teeth present.

#### Results

##### Description

**MPM-PV 3267.** This specimen (fig. 2, A–C) bears a tall, erect central cusp that is smooth on both the labial and lingual faces with no apparent longitudinal ridges (= enamel folding, vertical folds). The flat labial face and the strongly convex lingual face meet at a non-serrated cutting edge that curves in a weak sigmoid shape in lateral view. This cutting edge runs continuously over a pair of non-serrated, triangular lateral cusplets that are slightly

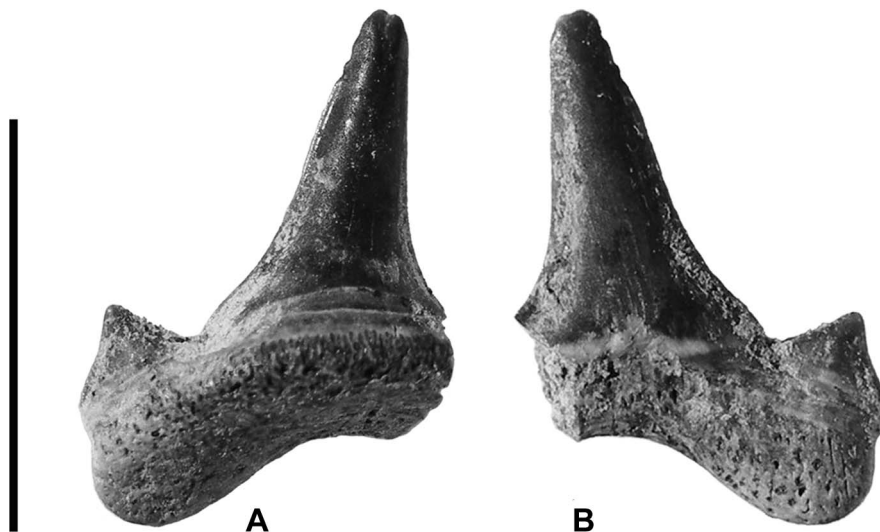

**Figure 3. MPM-PV 3268.** Lamniform tooth in (A) lingual, and (B) labial view. Note distinct narrowing in the apical two-thirds of principle cusp. Scale bar equals 1 cm.

doi:10.1371/journal.pone.0104800.g003

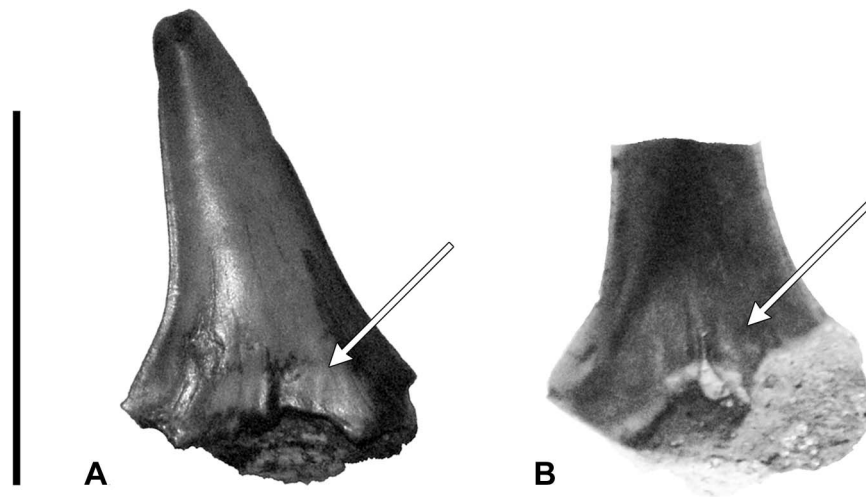

**Figure 4. Lamniform crown fragments in labial view.** (A) MPM-PV 3269, (B) MPM-PV 3270. Arrows point to longitudinal ridges (enameloid folding) at the base of the crown. Scale bar equals 1 cm. doi:10.1371/journal.pone.0104800.g004

divergent relative to the central cusp. The connection between all three cusps is only apparent on the labial face of the tooth. On the lingual face, there is a distinctive neck at the base of the crown that stretches over both the central cusp and lateral cusplets. The root is bilobate, and the root lobe tip that is preserved is rounded. A deep basal concavity indents the root in a U-shape, and the basal edge of each root lobe forms an internal angle of approximately 90°. The lingual protuberance is pronounced and somewhat restricted medially, tapering towards the basal ends of the root lobes. There is no nutrient groove or nutrient foramina.

**MPM-PV 3268.** This specimen (fig. 3, A–B) bears all the characteristics described for MPM-PV 3267 above, with the following exception: the U-shaped basal concavity is broader and more shallow than in MPM-PV 3267. The lingual protuberance is less pronounced and appears to bear multiple nutrient foramina, though these features may be an erosional artifact. The central cusp displays a slight but distinct distal inclination and significantly narrows in the apical two-thirds of its length.

**Additional Fragments.** Nine fragments were recovered from the locality. These include cusps and partial cusps with portions of

the root attached. Complete root lobes and lateral cusplets have not been preserved on any of these specimens. Although the fragmentary nature of the teeth do not allow for a confident diagnosis on an individual basis, the morphological features of the preserved crown and root portions completely overlap with those described above for MPM-PV 3267 and MPM-PV 3268, and also provide additional informative characters. Fragments MPM-PV 3269 and MPM-PV 3270 display weak enamel folding at the base of the crown on the labial face (fig. 4, A–B), but not on the lingual face. Fragments MPM-PV 3272 (fig. 5, B) and MPM-PV 3274 (fig. 5, E) bear a small, singular nutrient foramen on the lingual protuberance. In neither case does the foramen lie in a nutrient groove. All crown fragments bear a neck that maintains a relatively constant width across the entire base. Refer to Table 1 for measurement data of all teeth and tooth fragments.

#### Comparisons

***Archaeolamna.*** *Archaeolamna* is a widely distributed Cretaceous euselachian genus ranging from the Albian to the Maastrichtian [20], and includes the species *A. kopingensis*, *A.*

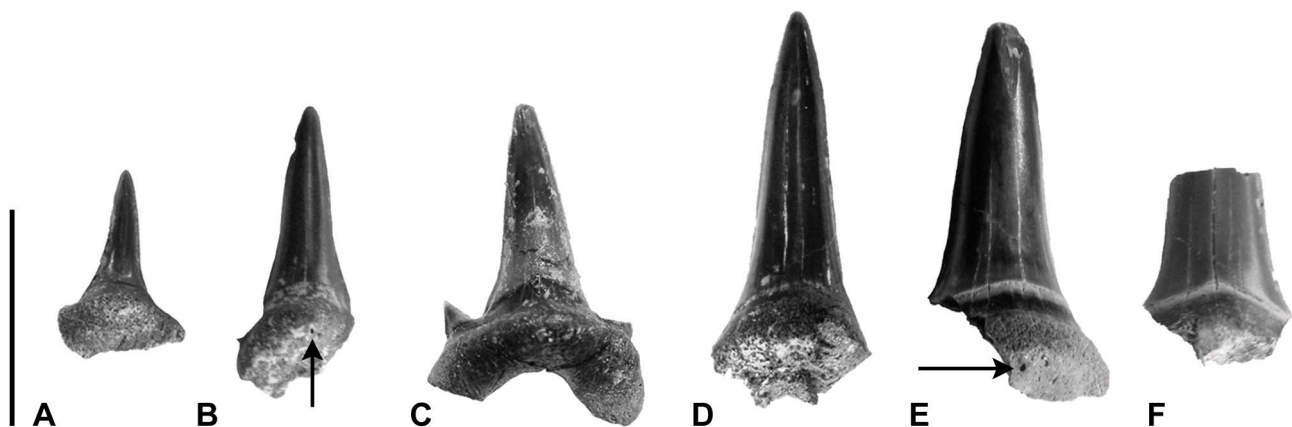

**Figure 5. A selection of recovered tooth fragments showing size range and overall symmetry of crowns.** (A) MPM-PV 3271, (B) MPM-PV 3272, (C) MPM-PV 3267, (D) MPM-PV 3273, (E) MPM-PV 3274, (F) MPM-PV 3275. All fragments are in lingual view. Arrows point to small nutrient foramina. Note that in all specimens, the lingual neck maintains a relatively equal width across the base of the crown. Scale bar equals 1 cm. doi:10.1371/journal.pone.0104800.g005

**Table 1.** Dental measurements for recovered tooth fragments.

| Specimen    | TH     | CH    | MCL   | DCL   | DI   |
|-------------|--------|-------|-------|-------|------|
| MPM-PV 3267 | 15.47  | 11.39 | 10.26 | 10.04 | 0.98 |
| MPM-PV 3268 | 12.53  | 10.74 | 9.36  | ~8.54 | 0.91 |
| MPM-PV 3269 | >12.79 | —     | —     | —     | —    |
| MPM-PV 3270 | —      | —     | —     | —     | —    |
| MPM-PV 3271 | >8.70  | 8.11  | —     | —     | —    |
| MPM-PV 3272 | >13.53 | —     | —     | —     | —    |
| MPM-PV 3273 | >18.42 | —     | —     | —     | —    |
| MPM-PV 3274 | >17.85 | —     | —     | —     | —    |
| MPM-PV 3275 | —      | —     | —     | —     | —    |

All measurements are in millimeters. “>” indicates that broken surfaces preclude full measurement; given value significantly less than for the complete tooth. Abbreviations: TH, tooth height; CH, crown height; MCL, mesial cutting edge length; DCL, distal cutting edge length; DI, distal inclination. doi:10.1371/journal.pone.0104800.t001

ex. gr. *A. kopingensis*, *A. cf. A. kopingensis*, *A. aff. kopingensis*, *A. kopingensis judithensis*, and *A. haigi*. Though described as having a “virtually global” distribution [21], *Archaeolamna* has been reported primarily from the Northern Hemisphere, with occurrences on four continents: Europe, including England (*Lamna arcuata* and *Plicatolamna arcuata*) [22], Belgium [23], France [24,25], and Sweden (*Odontaspis kopingensis* [26,27]; Asia, including Russia (*Pseudoisurus tomosus*) [20] and Kazakhstan [28], North America, including Canada [21,29–31] and the United States [19,32–37]; and Australia [20,38]. Specimens MPM-PV 3267–MPM-PV 3275 share the following characteristics with *Archaeolamna kopingensis*: (1) tall, triangular principle cusps with strongly convex lingual faces and flat or slightly convex labial faces, flanked by a single pair of lateral cusplets; (2) a continuous, non-serrated cutting edge that runs across the principle cusp and cusplets; (3) a bilobate root with a deeply indented basal concavity and pronounced lingual protuberance that bears no nutrient groove, and variably one nutrient foramen; and (4) a developed neck that maintains a relatively consistent width along the base of the crown [20,21,27,38,39].

Unlike the teeth of *A. kopingensis*, the root/crown boundary is strongly indented on the labial face of the Cerro Fortaleza specimens (per. comm, M. Siversson, 2014). The principle cusp also appears to be more elongate and slender than the robust, broad crown commonly seen in *A. kopingensis*, and is more similar to *A. haigi* in this regard [38]. Underwood and Cumbaa [21] noted that there was a robust form and a gracile form present in a Cenomanian assemblage of *Archaeolamna* ex. gr. *kopingensis* from Saskatchewan, and suggested that this might represent a sexually dimorphic characteristic. The specimens described here represent multiple individuals, all possessing a more gracile morphology.

The Cerro Fortaleza *Archaeolamna* are differentiated from the *A. haigi* by the lack of enamel folding on the lingual face of the crown. Additionally, the labial crown face of *A. haigi* anterior teeth are typically concave, whereas our specimens have a flat to slightly convex labial crown face [19,20].

**Cretalamna.** A recent reevaluation of *Cretalamna* has expanded the genus to include eight species, including *C. appendiculata*, *C. borealis*, and six undescribed species [40]. The root lobes of species within *Cretalamna* are typically quadrangular in shape, with a flattened ventral margin in lateral profiles [18,39–41]; this feature is not observed in any of the present specimens with intact roots. Additionally, two of the fragments, MPM-PV 3269 and MPM-PV 3270, possess weak enamel folding along the

labial side of the crown base. Within *Cretalamna*, such longitudinal ridges are only present in two species [40], and then only in lateroposterior teeth, which have more flattened root lobes and more recurved principle cusps than observed in any of the Cerro Fortaleza specimens.

**Dwardius.** The Cerro Fortaleza teeth are differentiated from *Dwardius* by the relatively constant width of the neck across the base of the central cusp and lateral cusplets (see fig. 5); *Dwardius* crowns bear a neck that tapers laterally, becoming significantly thinner beneath the lateral cusplets [42]. Additionally, the central cusp of the teeth in this study narrow in the apical two-thirds (exemplified in the Cerro Fortaleza specimens most clearly by MPM-PV 3272, fig. 5B), a feature not present in *Dwardius* [19,42].

**Dallasiella.** These specimens are differentiated from *Dallasiella willistoni* by the absence of a nutrient groove on any of the preserved root fragments. Whereas the lingual protuberance of *D. willistoni* specimens bear a short nutrient groove housing a large foramen [31], all of the Cerro Fortaleza specimens lack a nutrient groove, and only a few (e.g. MPM-PV 3272 and MPM-PV 3274, figs. 5B and 5F) possess a small nutrient foramen.

**Cretodus.** Our specimens are differentiated from *Cretodus* by the absence of longitudinal enamel folds on the lingual face of all specimens. Additionally the distinct longitudinal ridges at the base of the crown on both the labial and lingual faces is a characteristic feature for the genus is absent [39,43].

## Discussion

The overall symmetry and proportions of the Cerro Fortaleza lamniform tooth assemblage across a size range (see Table 1 and fig. 5) suggests that most of the specimens recovered are anteriorly situated teeth. Generally, lamniform principle cusps are distally directed in lateral tooth files in genera such as *Archaeolamna* [21] and *Cretalamna* [18,40], especially in the upper jaw. In contrast, the majority of tooth crowns collected from Cerro Fortaleza are erect and nearly symmetrical (fig. 5). MPM-PV 3269 represents the most asymmetrical tooth crown recovered (see fig. 4), and even the smallest tooth, MPM-PV 3271 (>8.7 mm), maintains a nearly symmetrical cusp. Because the locality of discovery did not allow for more thorough collection techniques than surface picking (e.g., screenwashing), it is likely that these specimens were subject to a collection bias towards larger teeth. Thus, the exclusive collection of teeth towards the anterior portion of the jaw suggests the anterior teeth were enlarged relative to their lateral counterparts;

otherwise, teeth from both jaw sections should have been recoverable by surface picking (see [40]). In any case, the lack of lateral teeth in this assemblage, as well as any fully completed specimens, limits the diagnostic features available for analysis and makes definitive identification of these teeth, even to a single species, challenging.

South America has a rich record of fossil lamniform sharks (e.g., *Carcharocles*, *Carcharodon*, *Carcharoides*, *Carcharias*, *Cretalamna*, *Isurus*, *Odontaspis*, *Scapanorhynchus*, *Serratolamna*, and *Squalicorax*) [41,44,45]. Though further fieldwork to produce a larger sample set with a reduced collecting bias towards large teeth is necessary for a definitive assignment of these specimens, the discovery of teeth unique from those previously described for the region broadens the known diversity of Late Cretaceous South American sharks.

The recovery of these teeth from what is widely accepted to be a fluvial depositional environment [4,6,7,12–16] suggests the taxon or taxa represented by this assemblage may have been able to tolerate a broad range of salinity, similar to the modern bull shark *Carcharhinus leucas* [46,47]. This interpretation is additionally supported by the exclusively terrestrial and freshwater associated fauna recovered at the locality. Further, recent studies suggest that

euryhalinity may be more common in extant marine elasmobranchs than previously reported [48], a phenomena that may apply to extinct forms as well. However, possible wear on the roots of at least one specimen, MPM-PV 3268 (fig. 3), leaves open the possibility that some of these teeth may have been transported or reworked from marine sediments. Future discoveries and sedimentological work in the region is needed to resolve the taxonomic affinity and euryhalinity of this enigmatic tooth assemblage.

## Acknowledgments

The authors thank G. Povazsan for assistance in the field, F. Novas (Museo Argentino de Ciencias Naturales), and S. Havia (Museo Regional Padre Manuel Jesús Molina) for permitting, and J. Spotila for logistical support. We are exceedingly grateful to the reviewers who helped greatly improve this manuscript.

## Author Contributions

Conceived and designed the experiments: ERS. Performed the experiments: ERS. Analyzed the data: ERS. Contributed reagents/materials/analysis tools: KJL. Wrote the paper: ERS VME LMI KJL.

## References

1. Feruglio E (1938) El Cretáceo Superior del lago San Martín. *Physis* 12: 293–338.
2. Feruglio E (1944) Estudios geológicos y glaciológicos en la región del lago Argentino (Patagonia). *Boletín de la Academia Nacional de Ciencias* 37: 3–255.
3. Leanza AF (1972) Andes Patagónicos australes. In: Leanza AF, editor. *Geología Regional Argentina*. Córdoba: Academia Nacional Ciencias. pp. 689–706.
4. Arbe HA, Hechem JJ (1984) Estratigrafía y facies de depósitos continentales, litorales y marinos del Cretácico Superior, Lago Argentino, Provincia de Santa Cruz. *Noveno Congreso Geológico Argentino, SC de Bariloche, Actas* 7: 124–158.
5. Arbe HA (1987) El Cretácico de la Cuenca Austral. *Boletín de Informaciones Petroleras* 9: 91–110.
6. Kraemer PE, Riccardi AC (1997) Estratigrafía de la región comprendida entre los lagos Argentino y Viedma (49° 40'–50° 10' lat. S), Provincia de Santa Cruz. *Revista de la Asociación Geológica Argentina* 52: 333–360.
7. Novas FE, Bellosi ES, Ambrosio A (2002) Los “Estratos con Dinosaurios” del Lago Viedma y Río La Leona (Cretácico, Santa Cruz): sedimentología y contenido fosilífero. *Actas del XV Congreso Geológico Argentino (CD-ROM)* 315: 1–7.
8. Leanza AF, Apesteguía S, Novas FE (2004) Cretaceous terrestrial beds from the Neuquén Basin (Argentina) and their tetrapod assemblages. *Cretaceous Research* 25: 61–87.
9. Ezcurra MD, Agnolin FL, Novas FE (2010) An abelisauroid dinosaur with a non-atrophied manus from the Late Cretaceous Pari Aike Formation of southern Patagonia. *Zootaxa* 2450: 1–25.
10. O’Gorman JP, Varela AN (2010) The oldest lower Upper Cretaceous plesiosaurs (Reptilia, Sauropterygia) from southern Patagonia, Argentina. *Ameghiniana* 47.
11. Riccardi AC, Rolleri EO (1980) Cordillera Patagónica Austral. *Simposio de Geología Regional Argentina*. Córdoba: Academia Nacional de Ciencias. pp. 1173–1306.
12. Macellari CE, Barrio CA, Manassero MJ (1989) Upper Cretaceous to Paleocene depositional sequences and sandstone petrography of southwestern Patagonia (Argentina and Chile). *Journal of South American Earth Sciences* 2: 223–239.
13. Marensi SA, Casadio S, Santillana SN (2003) Estratigrafía y sedimentología de las unidades del Cretácico superior-Paleógeno aflorantes en la margen sureste del lago Viedma, provincial de Santa Cruz, Argentina. *Rev Asoc Geol Argent* 58: 403–416.
14. Varela AN, Veiga GD, Poiré DG (2012) Sequence stratigraphic analysis of Cenomanian greenhouse palaeosols: A case study from southern Patagonia, Argentina. *Sedimentary Geology* 271: 67–82.
15. Egerton VM, Novas FE, Dodson P, Lacovara K (2013) The first record of a neonatal ornithomimid dinosaur from Gondwana. *Gondwana Research* 23: 268–271.
16. Arbe HA (2002) Análisis estratigráfico del Cretácico de la Cuenca Austral. In: Haller MJ, editor. *Geología y Recursos Naturales de Santa Cruz: Relatorio del XV Congreso Geológico Argentino, El Calafate*. Buenos Aires: Asociación Geológica Argentina. pp. 103–128.
17. Shimada K (2002) Dental homologies in lamniform sharks (Chondrichthyes: Elasmobranchii). *Journal of Morphology* 251: 38–72.
18. Shimada K (2007) Skeletal and Dental Anatomy of Lamniform Shark, *Cretalamna appendiculata*, from Upper Cretaceous Niobrara Chalk of Kansas. *Journal of Vertebrate Paleontology* 27: 584–602.
19. Cook TD, Newbrey MG, Murray AM, Wilson MVH, Shimada K, et al. (2011) A partial skeleton of the Late Cretaceous Lamniform shark *Archaeolamna hovingensis*, from the Pierre Shale of Western Kansas, USA. *Journal of Vertebrate Paleontology* 31: 8–21.
20. Siverson M (1996) Lamniform sharks of the mid Cretaceous Alinga Formation and Beedagong claystone, western Australia. *Palaeontology* 39: 813–849.
21. Underwood CJ, Cumbaa SL (2010) Chondrichthyan from a Cenomanian (Late Cretaceous) bonebed, Saskatchewan, Canada. *Palaeontology* 53: 903–944.
22. Woodward A (1894) Notes on the sharks’ teeth from British Cretaceous formations. *Proceedings of the Geological Association, London* 13: 190–200.
23. Herman J (1977) Les Sélaciens des terrains néocènes et paléocènes de Belgique et des contrées limitrophes. *Éléments d’une biostratigraphie intercontinentale. Mémoires pour servir à l’explication des Cartes géologiques et minières de la Belgique. Service Géologique de Belgique Mémoire* 15: 1–450.
24. Biddle JP (1993) Les Elasmobranches de l’Albien inférieur et moyen (Cretacé inférieur) de la Merne et de la Haute-Marne (France). In: Herman J, van Waas H, editors. *Elasmobranches et Stratigraphie Belgian Geological Survey Professional Paper* 264. pp. 191–249.
25. Vullo R, Néraudeau D, Allain R, Cappetta H (2004) Un nouveau gisement à microrestes de vertébrés continentaux et littoraux dans le Cénomanien inférieur de Fouras (Charente-Maritime, Sud-Ouest de la France). *Comptes Rendus Palevol* 4: 95–107.
26. Davis JW (1890) On the fossil fish of the Cretaceous Formations of Scandinavia. *Scientific Transactions of the Royal Dublin Society* 4: 363–434.
27. Siverson M (1992) Biology, dental morphology and taxonomy of Lamniform sharks from the Campanian of the Kristianstad Basin, Sweden. *Palaeontology* 35: 519–554.
28. Kennedy WJ, Ward DJ (2008) The upper Albian and lower Cenomanian succession at Kolbay, eastern Mangyshlak (southwestern Kazakhstan). *Bulletin de l’Institut Royal des Sciences Naturelles de Belgique, Sciences de la Terre* 78: 117–147.
29. Beavan NR, Russell AP (1999) An elasmobranch assemblage from the terrestrial-marine transitional Lethbridge Coal Zone (Dinosaur Park Formation: Upper Campanian), Alberta, Canada. *Journal of Paleontology* 73: 494–503.
30. Cumbaa SL, Schröder-Adams CJ, Day RG, Phillips AJ (2006) Cenomanian bonebed faunas from the northeastern margin, Western Interior Seaway, Canada. In: Lucas SG, Sullivan RM, editors. *Late Cretaceous Vertebrates from the Western Interior*. Albuquerque: New Mexico Museum of Natural History and Science. pp. 139–144.
31. Cook TD, Wilson MVH, Murray AM (2008) A middle Cenomanian euselachian assemblage from the Dunvegan Formation of northwestern Alberta. *Canadian Journal of Earth Sciences* 45: 1185–1197.
32. Cappetta H, Case GR (1975) Contribution à l’étude des sélaciens de groupe Monmouth (Campanien-Maestrichtien) du New Jersey. *Palaeontographica Abteilung A* 151: 1–46.
33. Case GR (1987) A new selachian fauna from the late Campanian of Wyoming (Teapot Sandstone Member, Mesaverde Formation, Big Horn Basin). *Palaeontographica Abteilung A* 197: 1–37.
34. Case GR (1978) A new selachian fauna from the Judith River Formation (Campanian) of Montana. *Palaeontographica Abteilung A* 160: 176–205.
35. Kent BW (1994) Fossil sharks of the Chesapeake Bay Region. Columbia, Maryland: Egan, Rees, and Boyer. 146 p.

36. Becker MA, Chamberlain JAJ, Stoffer PW (2000) Pathologic tooth deformities in modern and fossil chondrichthians: a consequence of feeding-related injury. *Lethaia* 33: 103–118.
37. Shimada K, Martin DJ (2008) Fossil fishes from the basal Greenhorn Limestone (Upper Cretaceous: Late Cenomanian) in Russell County, Kansas. In: Farley GH, Choate JR, editors. *Unlocking the Unknown: Papers Honoring Dr Richard J Zakrzewski Fort Hays Studies Special Issue Number 2*. Hays, Kansas: Fort Hays State University. pp. 89–103.
38. Siverson M (1997) Sharks from the Mid-Cretaceous Gearle Siltstone, Southern Carnarvon Basin, Western Australia. *Journal of Vertebrate Paleontology* 17: 453–465.
39. Welton BJ, Farish RF (1993) *The Collector's Guide to Fossil Sharks and Rays from the Cretaceous of Texas*. Lewisville, Texas: Before Time. 204 p.
40. Siverson M, Lindgren J, Newbrey MG, Cederström P, Cook TD (In press) Late Cretaceous (Cenomanian–Campanian) mid-palaeolatitude sharks of *Cretalamna appendiculata* type. *Acta Palaeontologica Polonica*.
41. Cappetta H (1987) *Chondrichthyes II: Mesozoic and Cenozoic Elasmobranchii*; Schultz HP, editor: Gustav Fischer Verlag, Stuttgart. 193 p.
42. Siverson M (1999) A new large lamniform shark from the uppermost Gearle Siltstone (Cenomanian, Late Cretaceous) of Western Australia. *Transactions of the Royal Society of Edinburgh* 90: 49–66.
43. Schwimmer DR, Hooks GE, Johnson B (2002) Revised taxonomy, age, and geographic range of the large lamniform shark *Cretodus semiplicatus*. *Journal of Vertebrate Paleontology* 22: 704–707.
44. Arratia G, Cione AL (1996) The Record of Fossil Fishes of Southern South America. In: Arratia G, editor. *Contributions of Southern South America to Vertebrate Paleontology*. München: Verlag Dr. Friedrich Pfeil. pp. 9–72.
45. Bogan S, Agnolin FL (2010) Primera ictiofauna marina del Cretacico Superior (Formacion Jaguel, Maastrichtiano) de la provincia de Rio Negro, Argentina. *Papeis Avulsos de Zoologia* 50: 175–188.
46. Thorson TB, Cowan CM, Watson DE (1973) Body fluid solutes of juveniles and adults of the euryhaline Bull Shark *Carcharhinus leucas* from freshwater and saline environments. *Physiological Zoology* 46: 29–42.
47. Heupel MR, Simpfendorfer CA (2008) Movement and distribution of young bull sharks *Carcharhinus leucas* in a variable environment. *Aquatic Biology* 1: 277–289.
48. Wosnick N, Freire CA (2013) Some euryhalinity may be more common than expected in marine elasmobranchs: The example of the South American skate *Zapteryx brevirostris* (Elasmobranchii, Rajiformes, Rhinobatidae). *Comparative Biochemistry and Physiology Part A: Molecular & Integrative Physiology* 166: 36–43.
